# Supplementary material for: RETRACTED ARTICLE: Efficacy and safety of water-free topical cyclosporine for moderate to severe dry eye disease: a systematic review and meta-analysis
Source: Springer Nature journal article supplement (doi:10.1186/s12348-025-00467-9), 2025-03-06
Supplement: MOESM1 [file 12348_2025_467_MOESM1_ESM.pdf]

## Search Strategy

((“Dry Eye Syndromes” OR “Dry Eye Syndrome” OR “Dry Eye Disease” OR “Dry Eye Diseases” OR “Dry Eye” OR “Dry Eyes” OR “Evaporative Dry Eye Disease” “Evaporative Dry Eye Syndrome” OR “Evaporative Dry Eye” OR “Evaporative Dry Eyes” OR “DED” OR “keratoconjunctivitis sicca” OR “KCS”) AND (“Moderate” OR “Severe”) AND (“Water-Free Cyclosporine” OR “CyclASol” OR “Waterfree Cyclosporine” OR “Water-Free Topical Cyclosporine” OR “Water-Free Cyclosporine A”))
